# Supplementary material
Source: Springer Nature journal article supplement (https://www.springermedizin.de/resource/supplementary/12906_2010_470_MOESM1_ESM.pdf/9519566)

## Effect of Plumbagin on collagen Type II induced arthritis

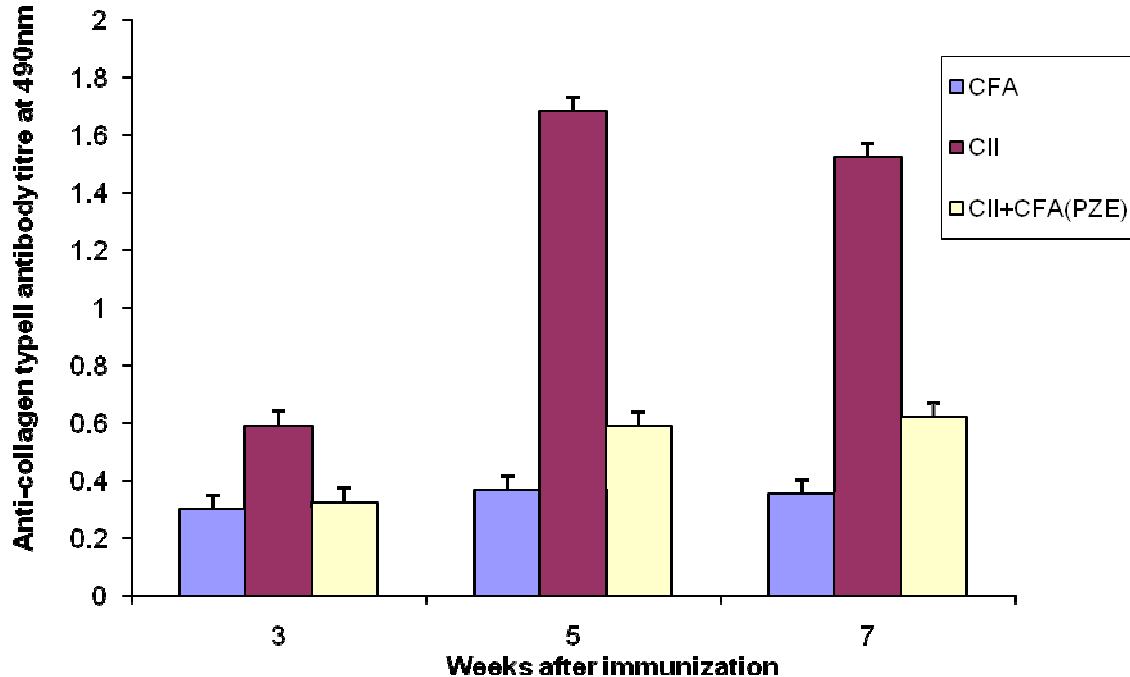

Supplement: MOESM1 [file 9519566]
